# Supplementary material for: Energetic multi-component molecular solids of tetrafluoroterephthalic acid with some aza compounds by strong hydrogen bonds and weak intermolecular interactions of C–H⋯F and C–H⋯O
Source: Royal Society of Chemistry journal article supplement (doi:10.1039/c4ce00133h), 2014-01-01
Supplement: c4ce00133h1.pdf [file c4ce00133h1.pdf]

## Supporting information for this article:

### TGA and DSC curves

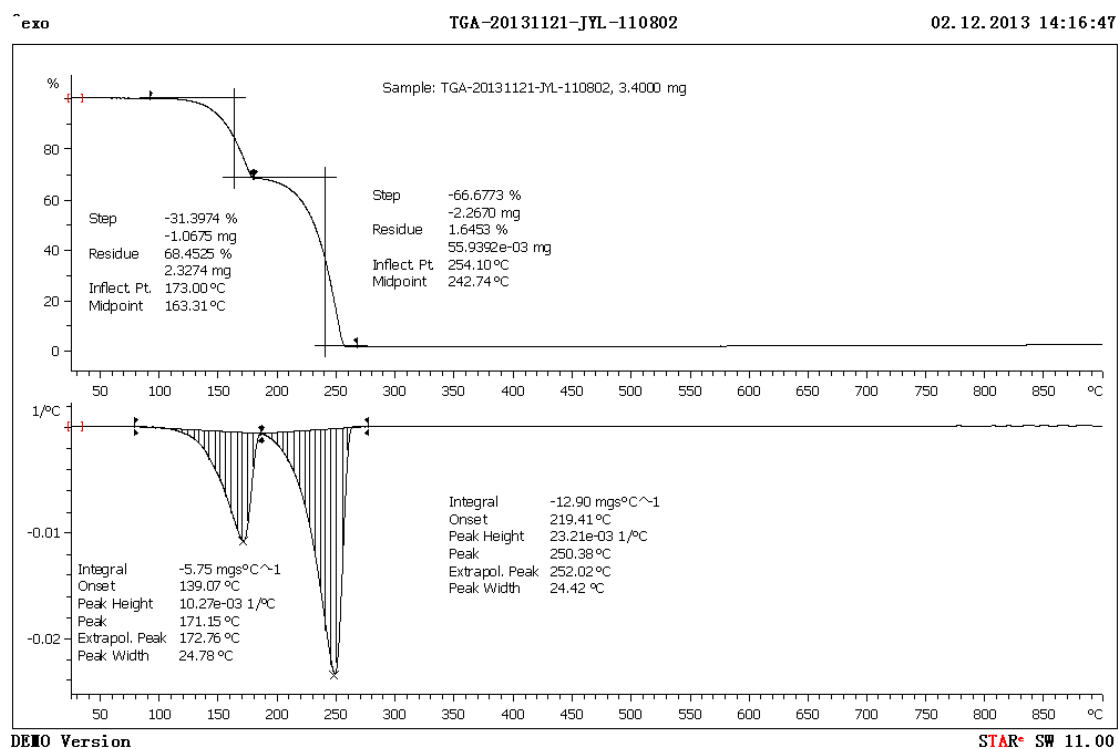

The TGA and DSC curves of 1

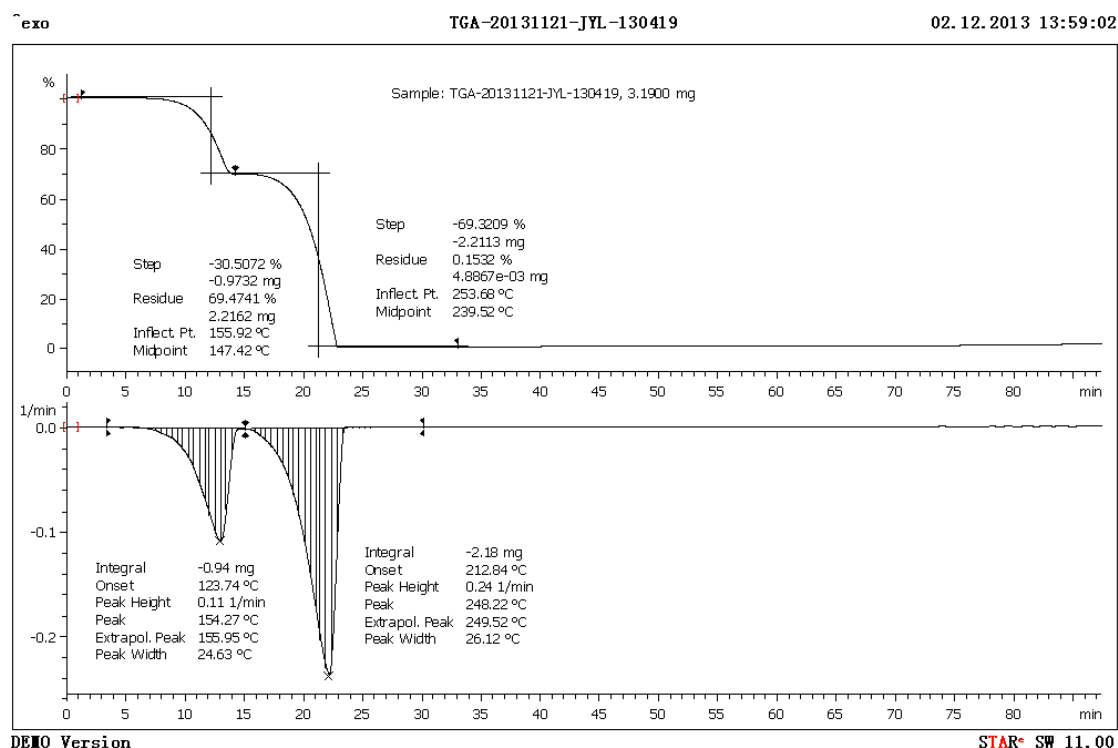

The TGA and DSC curves of 2

exo

!&TGA-20131121-JYL-031420

02.12.2013 14:21:49

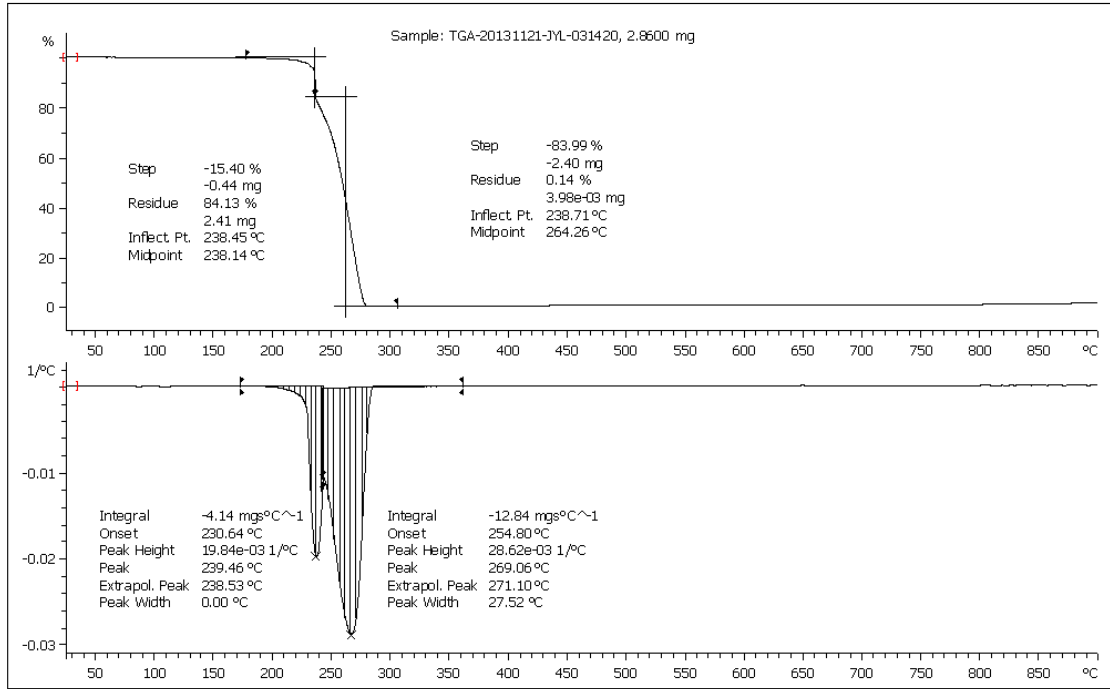

DEMO Version

STAR<sup>®</sup> SW 11.00

The TGA and DSC curves of 3

exo

TGA-20131121-JYL-042523

02.12.2013 15:24:20

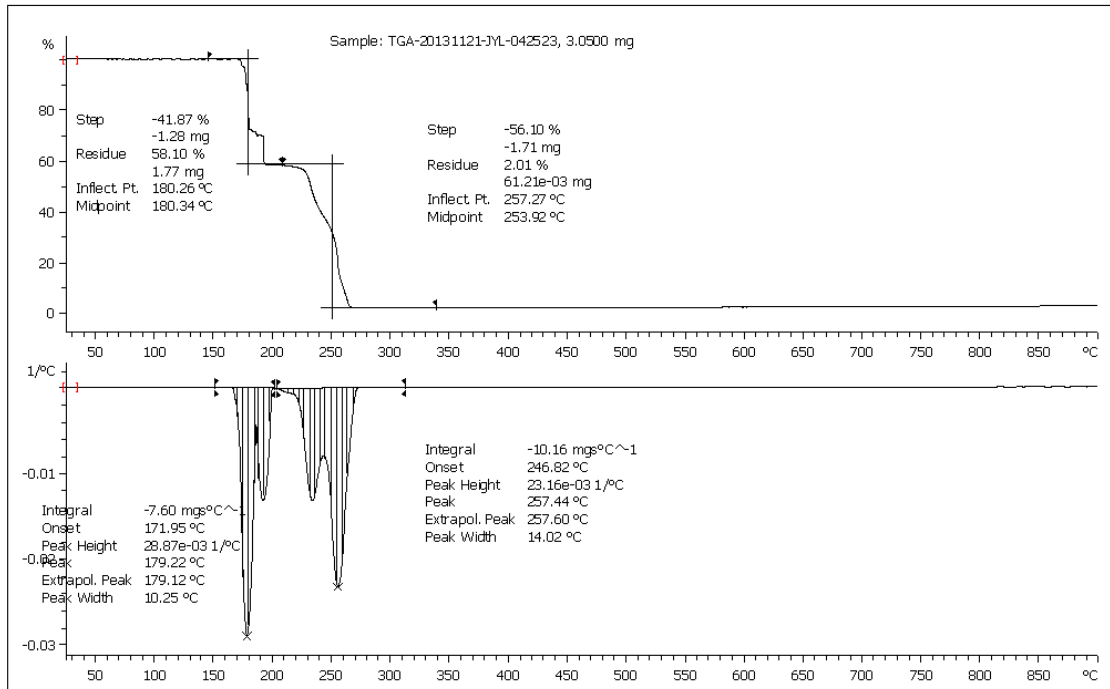

DEMO Version

STAR<sup>®</sup> SW 11.00

The TGA and DSC curves of 4

exo

TGA-20131121-JYL-13031117

02.12.2013 13:57:27

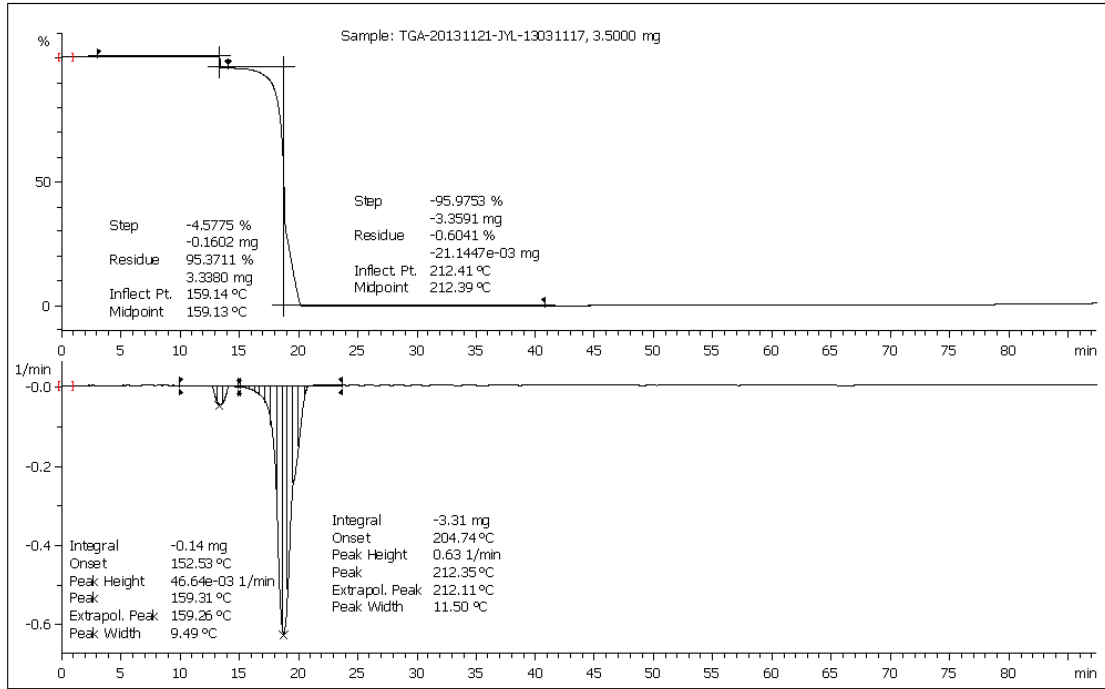

The TGA and DSC curves of 5

exo

TGA-20131121-JYL-050910

02.12.2013 14:33:33

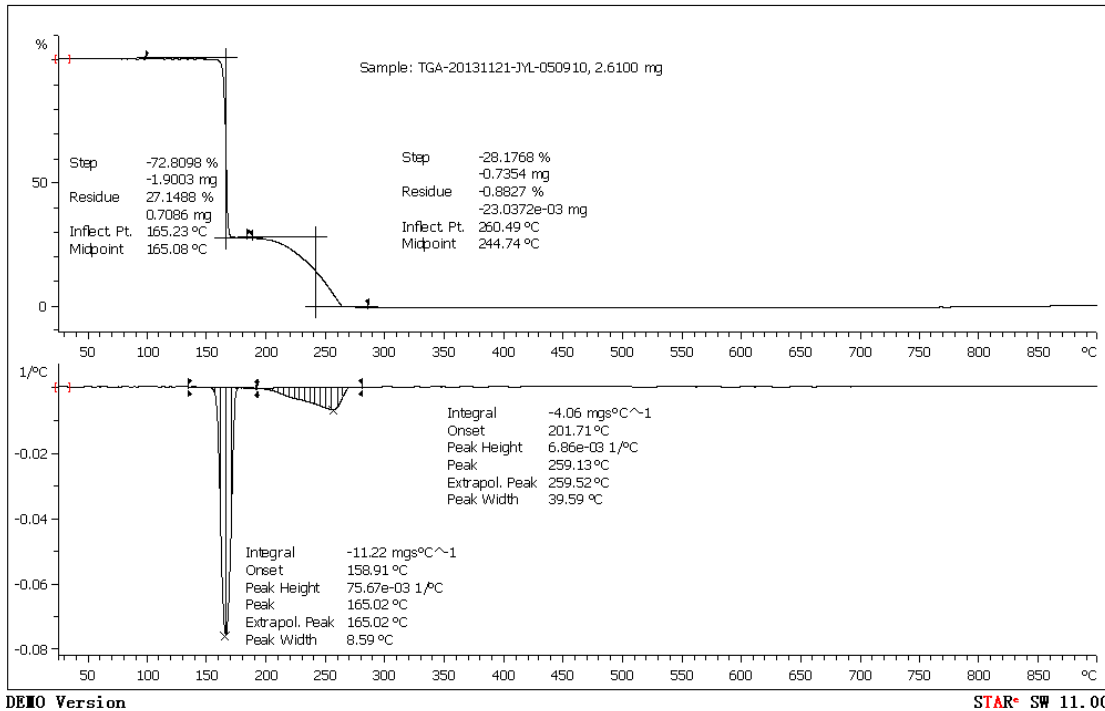

The TGA and DSC curves of 6

exo

TGA-20131223-JYL-1

06.01.2014 10:22:50

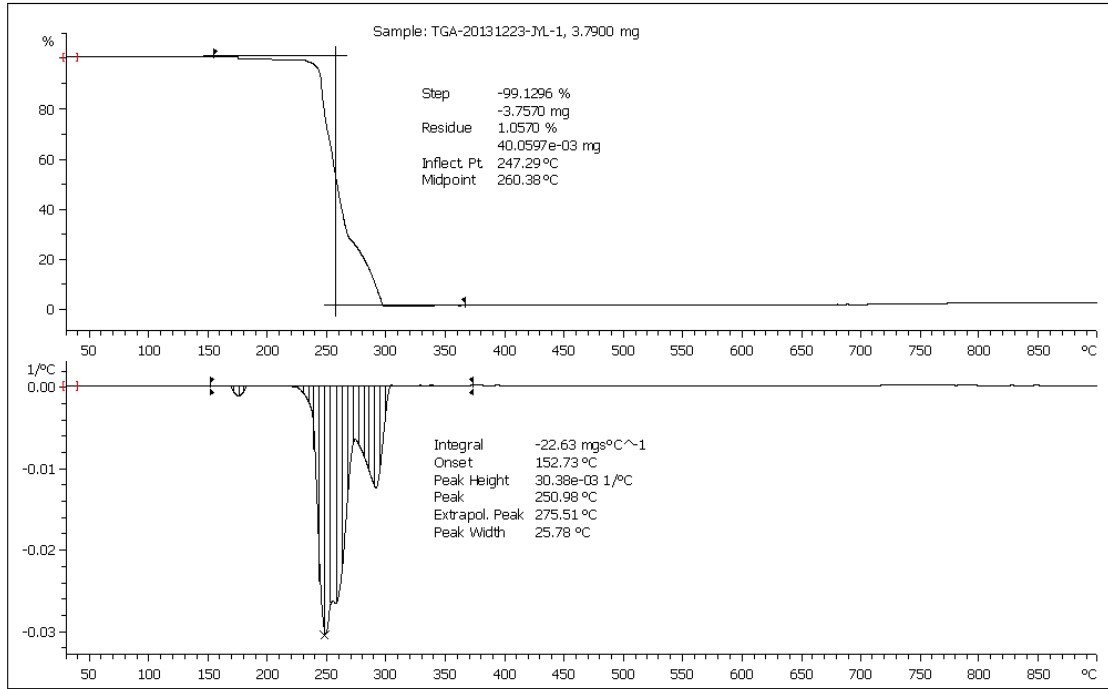

The TGA and DSC curves of 7

exo

!TGA-20131121-JYL-130509

02.12.2013 14:03:52

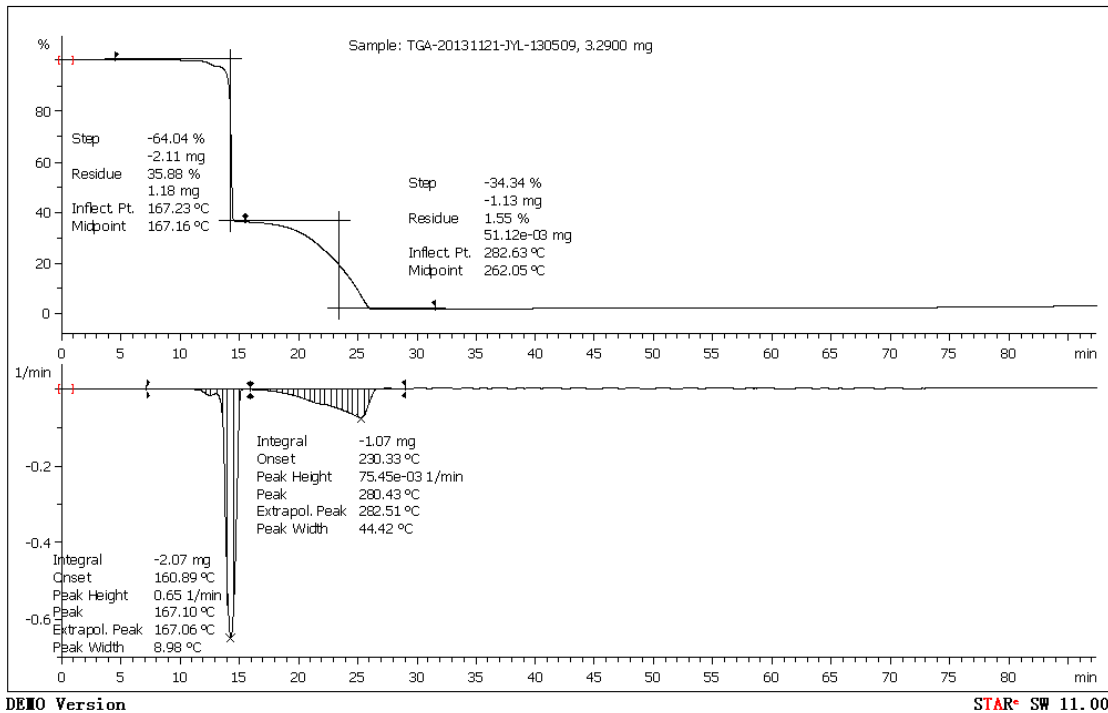

The TGA and DSC curves of 8

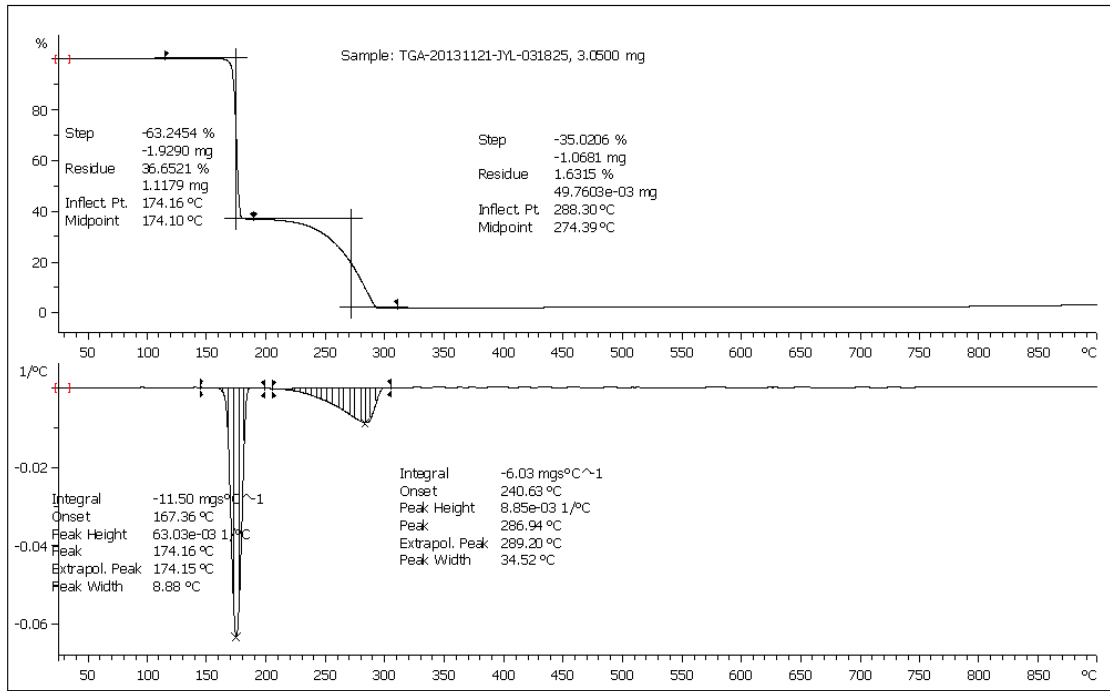

DEMO Version

STAR SW 11.00

The TGA and DSC curves of 9

### IR curves

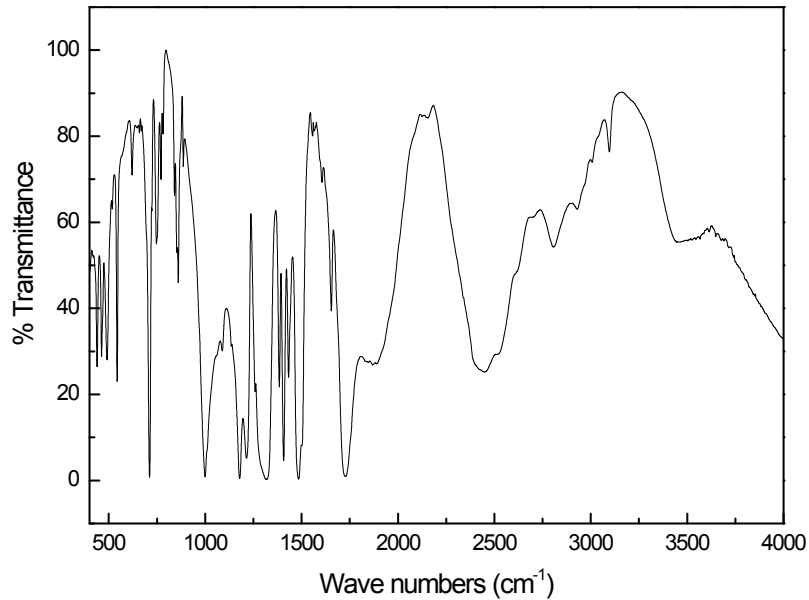

The IR curve of 1

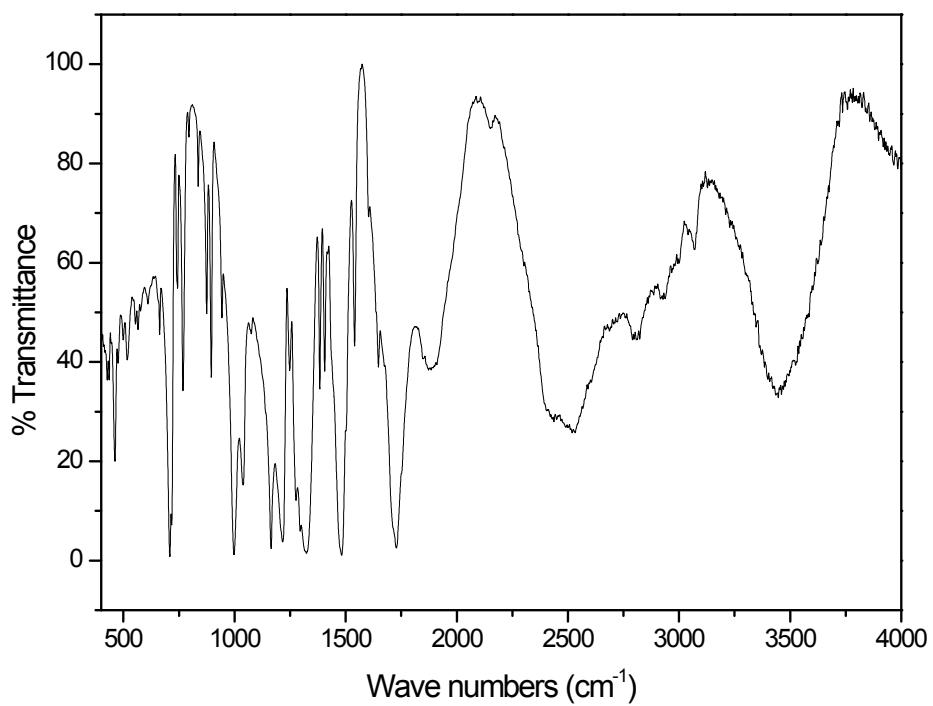

The IR curve of **2**

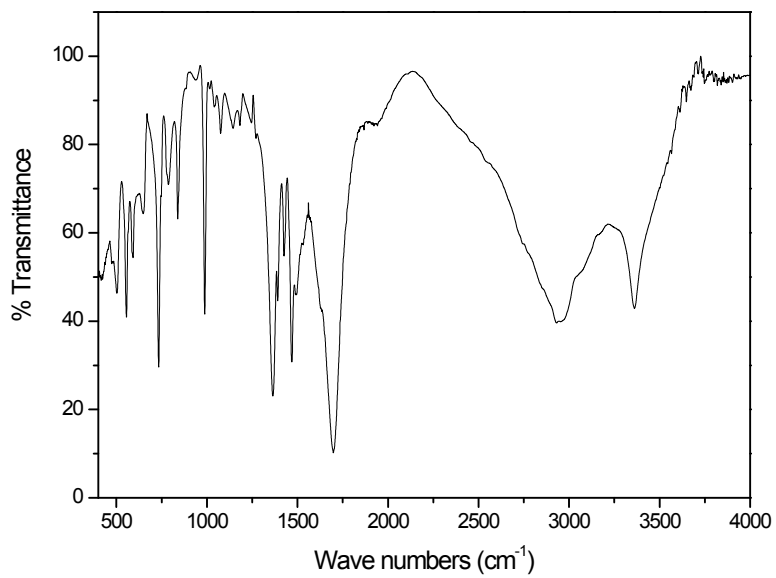

The IR curve of **3**

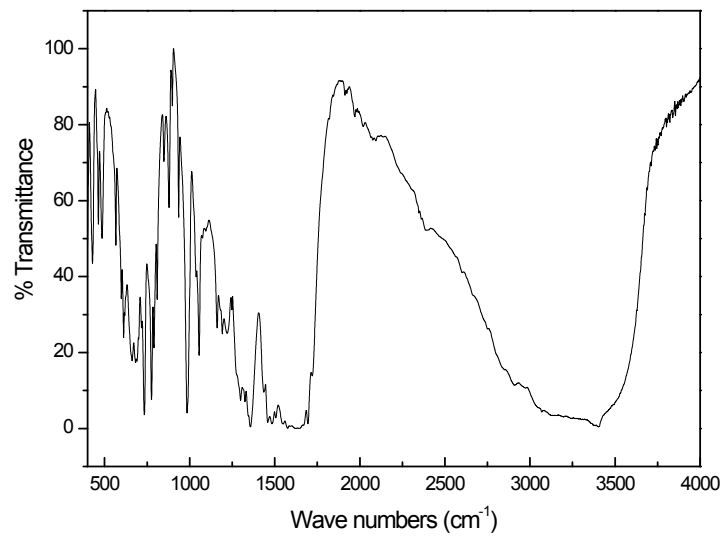

The IR curve of **4**

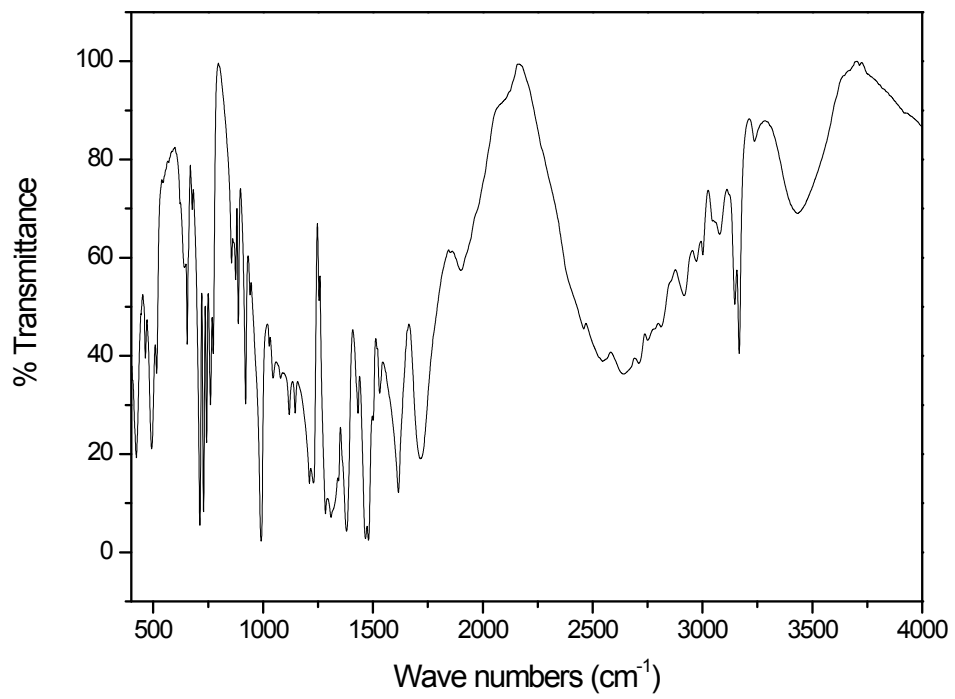

The IR curve of **5**

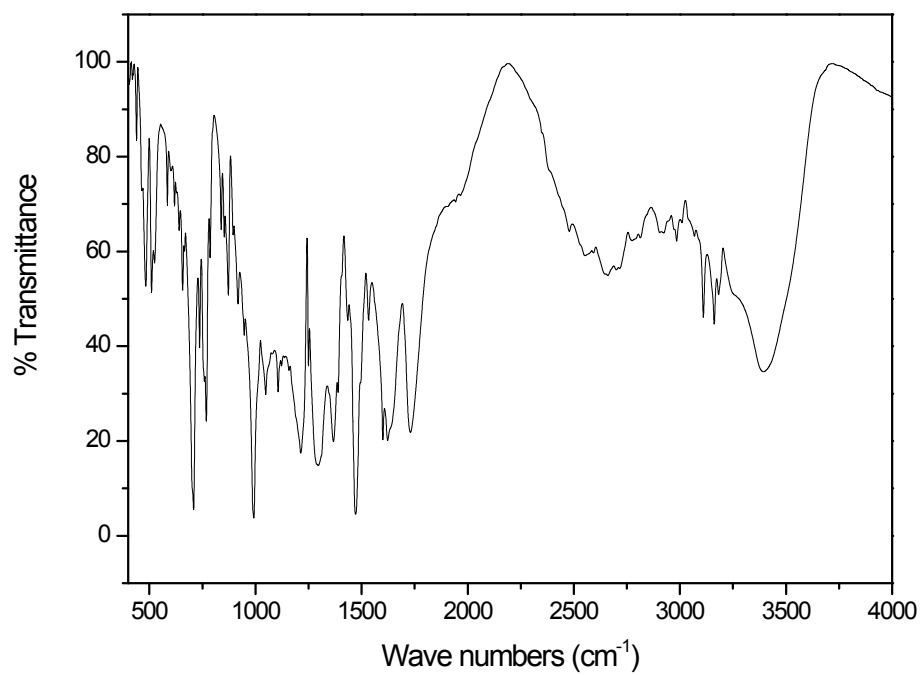

The IR curve of **6**

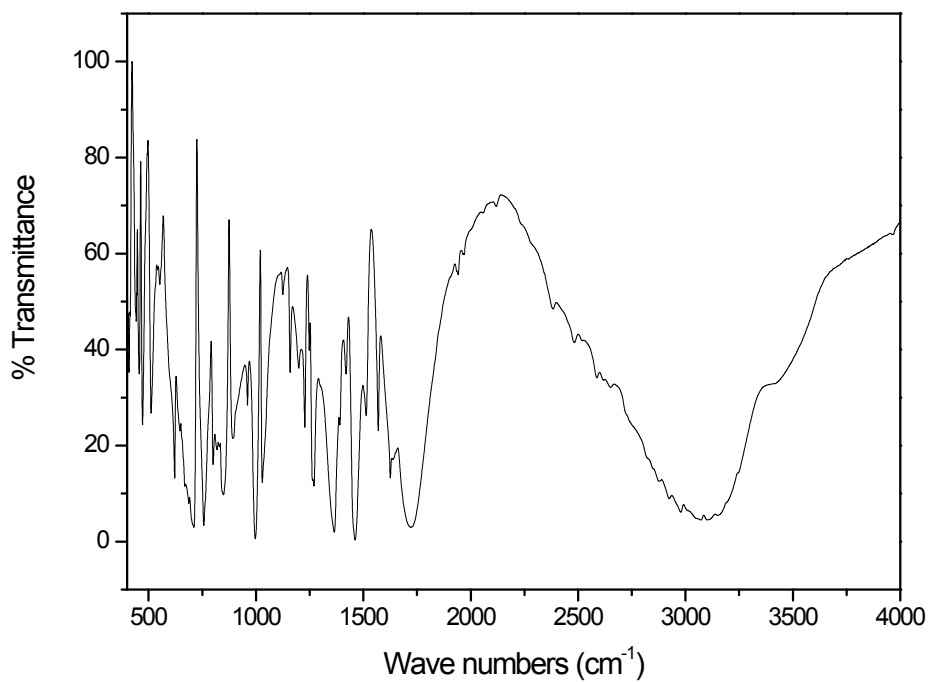

The IR curve of **7**



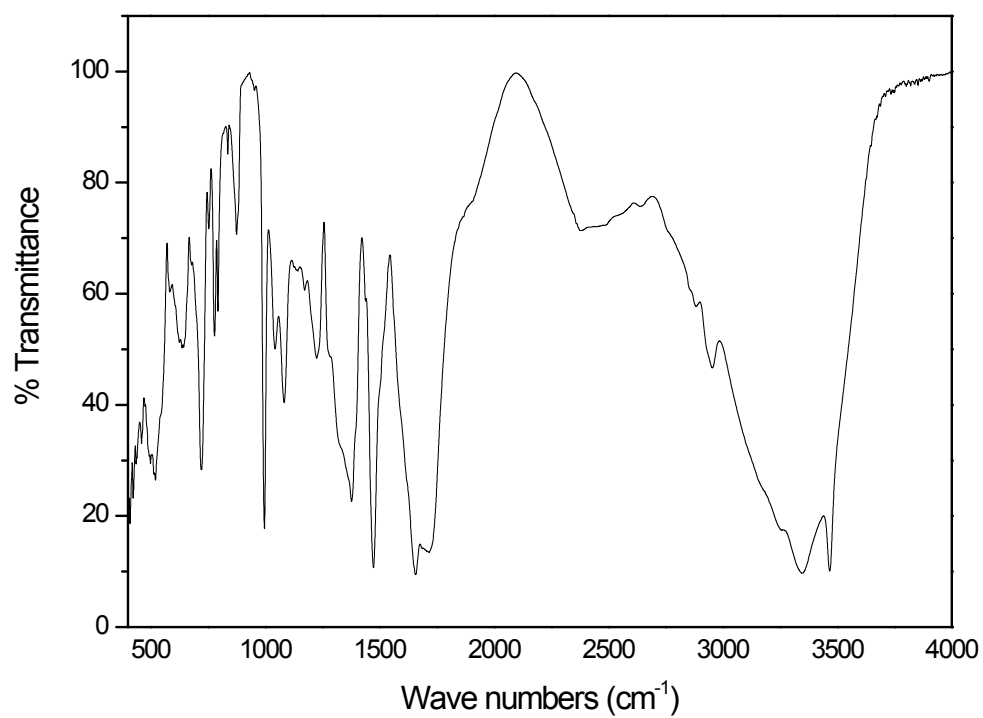

The IR curve of **8**

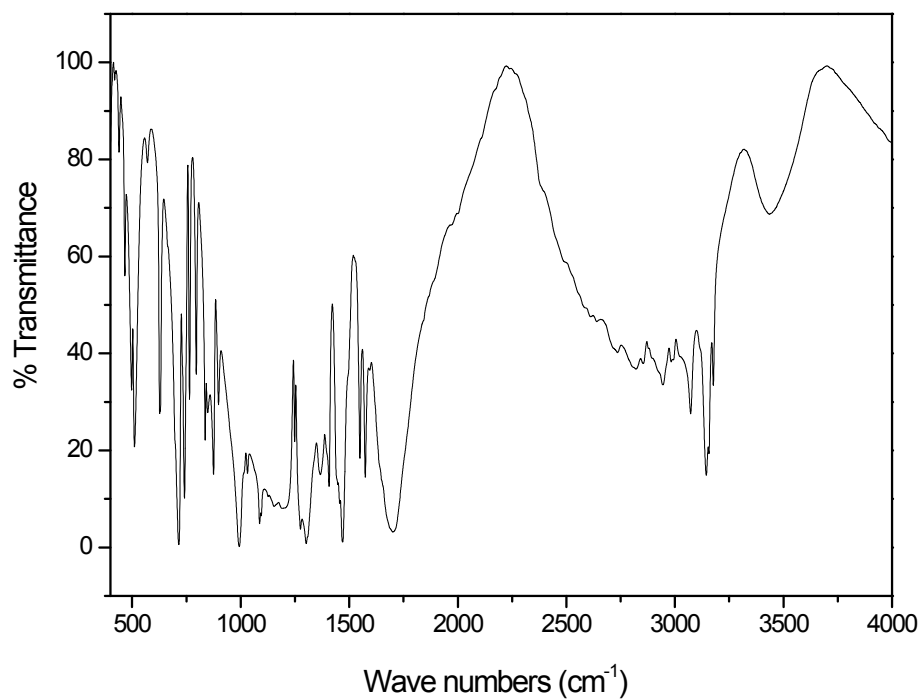

The IR curve of **9**
